# Supplementary material for: Measuring Integrated Information from the Decoding Perspective
Source: PubMed Central journal article supplement (PMC4721632; doi:10.1371/journal.pcbi.1004654), 2016-01-21
Supplement: pcbi.1004654.s002.pdf [file pcbi.1004654.s002.pdf]

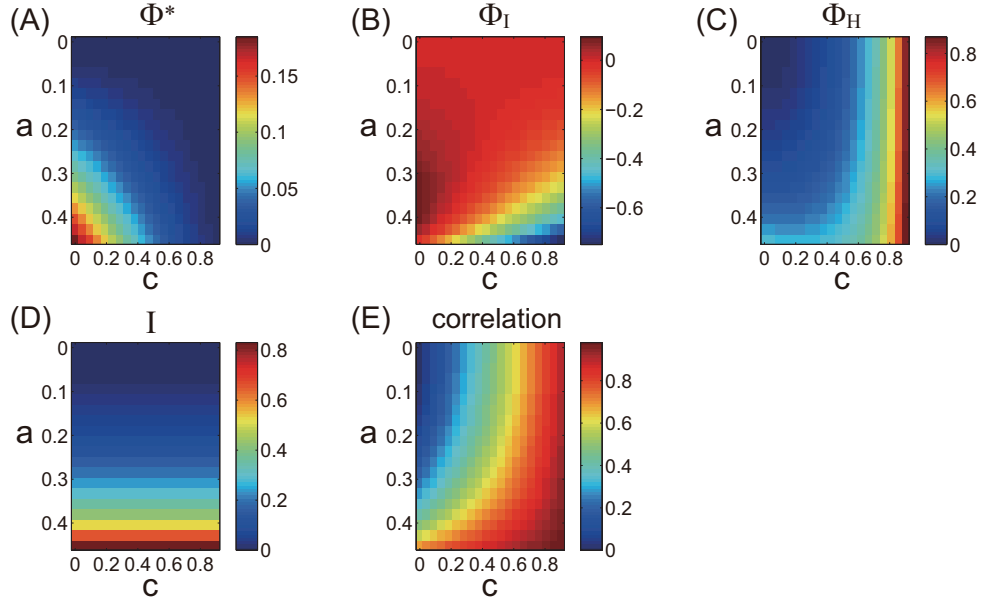

**S1 Figure.** Behaviors of  $\Phi^*$  (A),  $\Phi_I$  (B),  $\Phi_H$  (C), mutual information  $I$  (D), and correlation (E) when the strength of connections  $a$  and the strength of noise correlation  $c$  are both varied in a linear regression model (Eq. 13 in the main text).

As we detailed in the main article, integrated information should be lower bounded by 0 and be upper bounded by the mutual information in the whole system  $I$ . In the main article, we used a simple linear regression model to demonstrate that  $\Phi_I$  and  $\Phi_H$  violate these bounds. Fig. S1 shows the behaviors of  $\Phi^*$  (A),  $\Phi_I$  (B),  $\Phi_H$  (C), mutual information  $I$  (D), and correlation coefficient between units (E) when the strength of connections  $a$  and the strength of noise correlation  $c$  are both varied in the same linear regression model as in the main article (Eq. 13). As we can see in S1 Figure,  $\Phi_I$  goes negative when the degree of correlation is high and thus, it does not satisfy the lower bound.  $\Phi_H$  is not 0 even when there is no information ( $a = 0$ ) and thus, it does not satisfy the upper bound. By comparing the panels (C) and (D), which are in the same color scale, we can see that  $\Phi_H$  violates the upper bound when the noise correlation  $c$  is high.  $\Phi^*$  always satisfies both the lower bound and the upper bound and therefore, it can be considered as a proper measure of integrated information.
